# Supplementary material for: Relationship of insect biomass and richness with land use along a climate gradient
Source: PubMed Central journal article supplement (PMC8511018; doi:10.1038/s41467-021-26181-3), 2021-10-12
Supplement: 41467_2021_26181_MOESM1_ESM.pdf [file 41467_2021_26181_MOESM1_ESM.pdf]

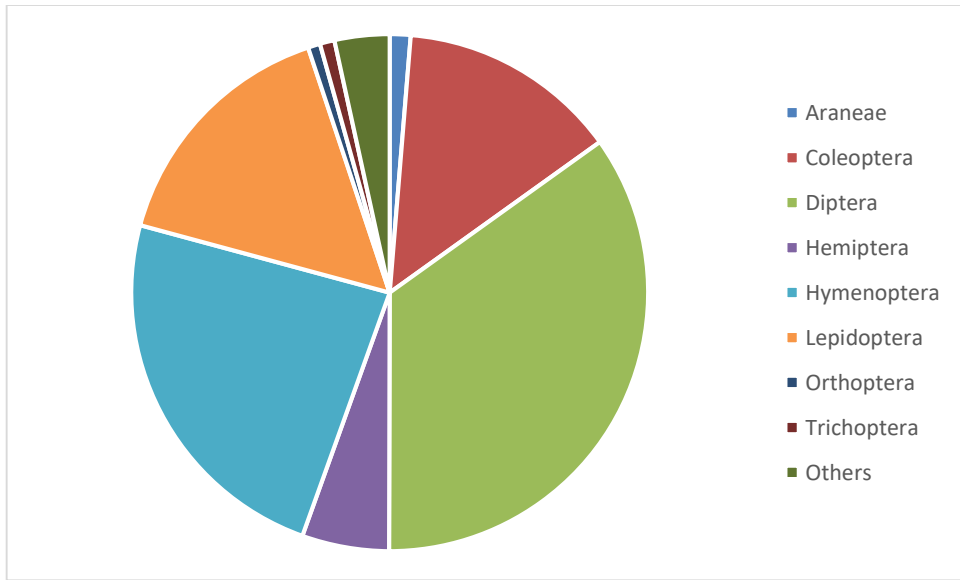

20

21 **Supplementary Figure 1. Distribution of detected BINs across taxonomic orders.** Only the eight most  
 22 common orders are displayed, the remainder was combined in the category “Others”.

23

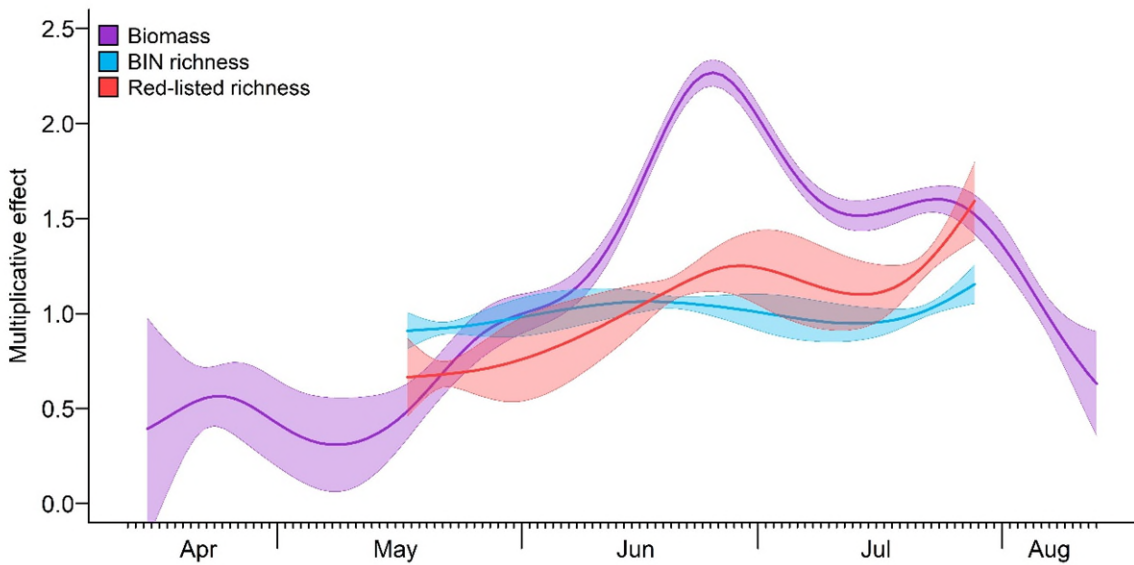

24

25 **Supplementary Figure 2. Partial effects of season on biomass, total richness of barcode index**  
 26 **numbers (BINs), and the richness of red-listed species without correcting for local temperature and**  
 27 **humidity.** Partial effects from generalized additive mixed models were controlled for elevation, the  
 28 geographic location of the traps, and land use. Note that richness was determined for only three of the eight

29 sampling campaigns. Displayed are the partial effect of season, as a smooth term acting multiplicatively on  
 30 the expected outcome per time unit. Error envelopes depict standard errors below and above the estimated  
 31 mean responses.

32

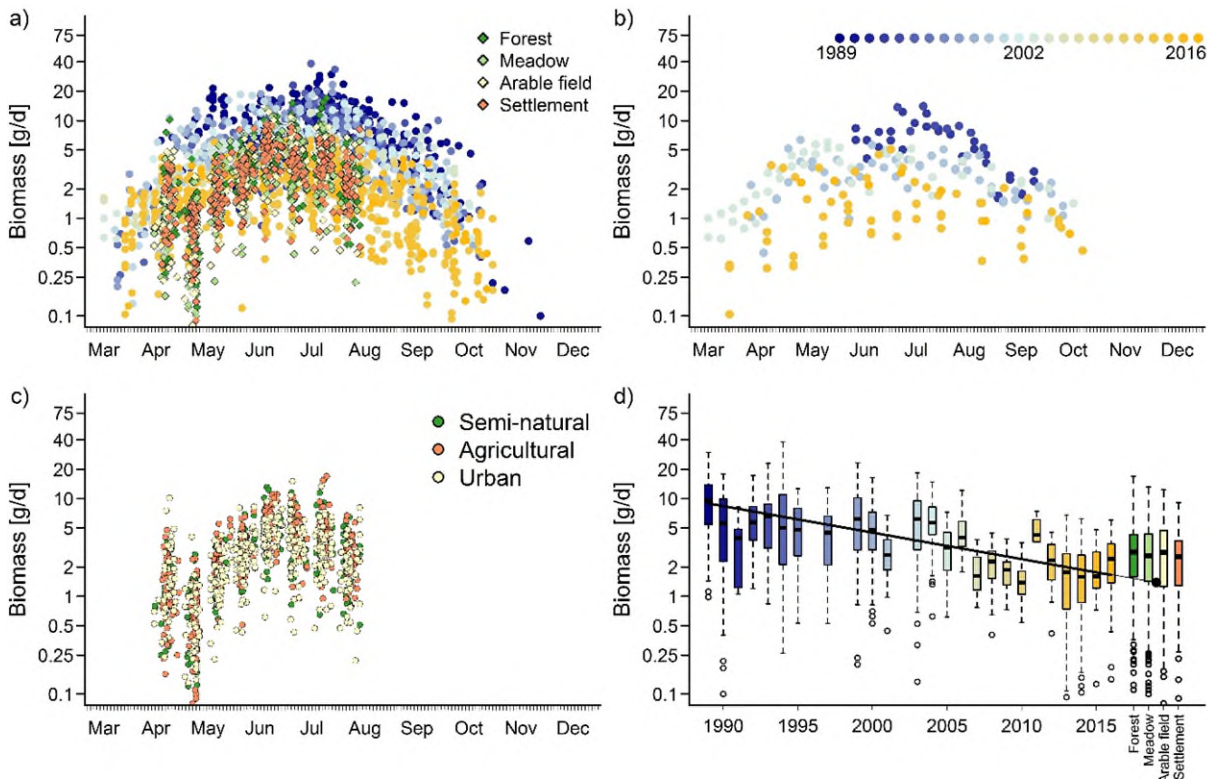

33  
 34 **Supplementary Figure 3. Comparison with biomass data reported in Hallmann et al.<sup>12</sup>** Hallmann et  
 35 al.<sup>12</sup> data were collected with a similar malaise trap type in protected areas of Northern Germany. a) all data  
 36 points from Hallmann et al.<sup>12</sup> in yellow, pale blue and dark blue throughout the season and LandKlif data  
 37 colored according to local landuse type. b) semi-natural plots in Hallmann et al.<sup>12</sup> (here plotted separately)  
 38 showed similar patterns in time as the other habitats. c) all LandKlif data points throughout the season by  
 39 landscape type. d) long-term trends over 27 years (Hallmann et al.<sup>12</sup>, n=1503; linear slope extrapolated to  
 40 continue line to 2019 for visual reference) and LandKlif data points by local habitat (2019, n=1293). The  
 41 black lines of the box plots show the medians, boxes represent data within the 25<sup>th</sup> and 75<sup>th</sup> percentile and  
 42 whiskers display 1.5x the interquartile range.

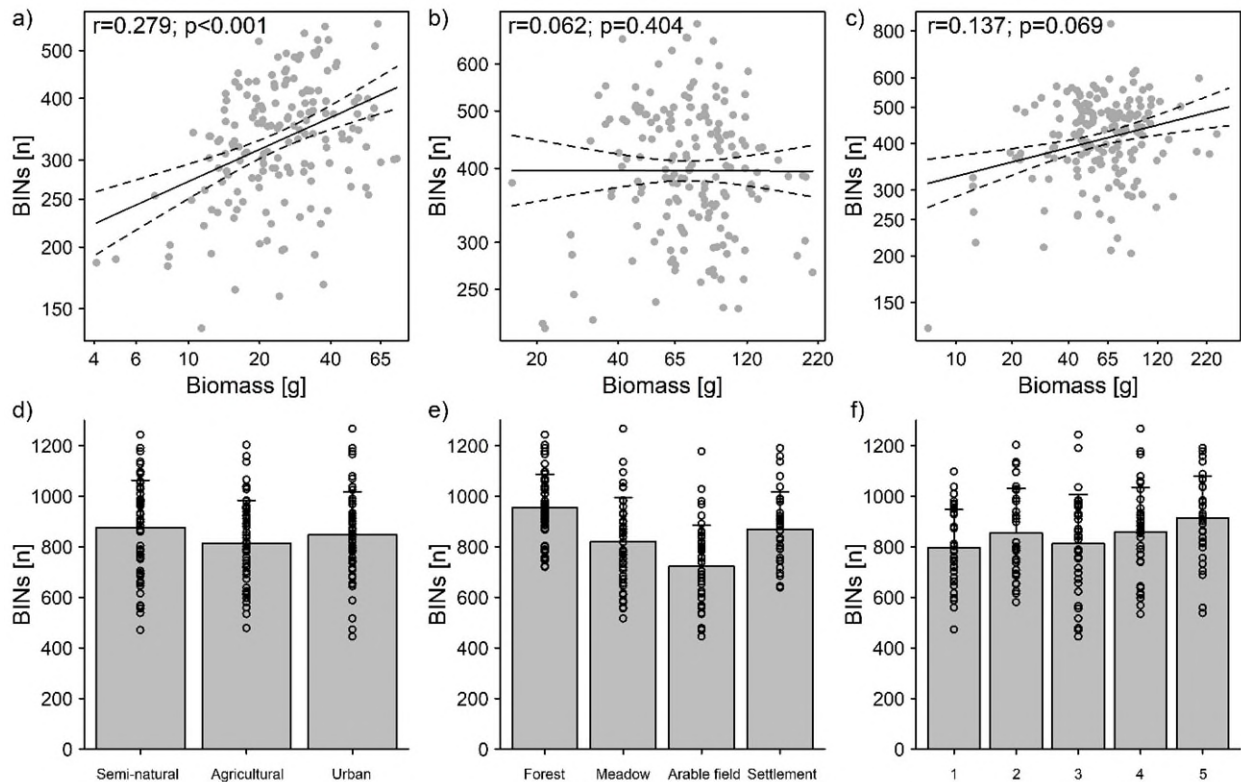

44

45 **Supplementary Figure 4. Correlation plots for Biomass and BINs for the three sampling campaigns**  
 46 **in May (a), June (b), July (c) and accumulative number of BINs across habitat (d), landscape (e) and**  
 47 **climate categories (f) for all 179 study sites.** The continues black line in a)-c) represents the linear  
 48 regression line with confident intervals displayed as dashed lines. Climate zones were defined based on the  
 49 mean annual temperature over 30 years (1981–2010): <7.5, 7.5–8, 8–8.5, 8.5–9, >9°C, see also method  
 50 section. Data in d)-f) is shown as mean values (n=179), error bars display standard deviation.

51

52 **Supplementary Table 1. Name and Sequence of Primers used for multiplex PCR. HTS-**  
 53 **adapted mini-barcode primers targeting mitochondrial CO1-5P region**

| Primers   | Sequence                  |
|-----------|---------------------------|
| mlCOIintF | GWACWGGWTGAACWGTWTAYCCYCC |
| dgHCO2198 | TAAACTTCAGGGTGACCAAARAYCA |

54

55

56 **Supplementary Table 2. Results of a generalized additive mixed model for average local**  
 57 **temperature.** Values are displayed in comparison to local forests for local habitat scale and to  
 58 semi-natural landscapes for landscape scale categories. For additional model parameters see Table  
 59 1. For additional information see annotated code.

| Predictors                                     | Local Temperature              |                                 |         |                  |
|------------------------------------------------|--------------------------------|---------------------------------|---------|------------------|
|                                                | Estimates<br>* 10 <sup>3</sup> | std. Error<br>* 10 <sup>3</sup> | t-value | p                |
| (Intercept)                                    | 17194.9                        | 1739.5                          | 9.885   | <b>&lt;0.001</b> |
| Local land use: Forest                         |                                |                                 |         |                  |
| Meadow                                         | 316.2                          | 72.22                           | 4.379   | <b>&lt;0.001</b> |
| Arable field                                   | 494.0                          | 74.05                           | 6.671   | <b>&lt;0.001</b> |
| Settlement                                     | 738.9                          | 81.35                           | 9.084   | <b>&lt;0.001</b> |
| Landscape land use:                            |                                |                                 |         |                  |
| Semi-natural                                   |                                |                                 |         |                  |
| Agricultural                                   | -51.59                         | 91.73                           | -0.562  | 0.573            |
| Urban                                          | 198.77                         | 94.30                           | 2.108   | <b>0.035</b>     |
| Long-term mean annual precipitation            | -2.396                         | 0.700                           | -3.423  | <b>&lt;0.001</b> |
| Long-term mean annual near surface temperature | 164.5                          | 138.0                           | 1.192   | 0.233            |
| Observations                                   | 1301                           |                                 |         |                  |
| R <sup>2</sup>                                 | 0.957                          |                                 |         |                  |

60  
 61  
 62

63 **Supplementary Table 3. Number of excluded samples per landscape and habitat type:**  
 64 Overall, 142 samples were excluded from the statistical analyses, 46 due to missing climate data  
 65 and 96 due to other complications. This resulted in the exclusion of 139 samples from the analysis  
 66 of the biomass and 27 for the analysis of BINs.

|                      | <b>Landscape type:</b> |              |            |
|----------------------|------------------------|--------------|------------|
|                      | Semi-natural           | Agricultural | Urban      |
| <b>Habitat type:</b> |                        |              |            |
| Forest               | 17                     | 17           | 13         |
| Meadow               | 13                     | 4            | 10         |
| Arable field         | 4                      | 26           | 9          |
| Settlement           | 4                      | 1            | 24         |
| <b>Total:</b>        |                        |              | <b>142</b> |

68  
 69  
 70

## 71 **Supplementary Methods**

### 72 *Next generation sequencing*

73 Preservative ethanol was removed and the mixed arthropod samples were dried overnight in a 60–  
 74 70°C oven to evaporate off the residual ethanol. The dried arthropods were then homogenised with  
 75 stainless steel beads within a FastPrep 96 system (MP Biomedicals). DNA was extracted from all  
 76 samples by incubating them in a 90:10 solution of animal lysis buffer (buffer ATL, Qiagen  
 77 DNEasy tissue kit, Qiagen, Hilden, Germany) and proteinase K. After an overnight incubation in  
 78 a 56°C oven, the samples were left to cool to room temperature. DNA was extracted from 200-µL  
 79 aliquots using the DNEasy blood & tissue kit (Qiagen) following the manufacturer’s instructions.  
 80 Multiplex PCR was performed using 5 µL of extracted genomic DNA, Plant MyTAQ (Bioline,  
 81 Luckenwalde, Germany) and high-throughput sequencing (HTS)-adapted mini-barcode primers  
 82 (Supplement Table1) targeting the mitochondrial CO1-5P region, following Leray et al., 2013<sup>1</sup> –  
 83 also see Morinière *et al.*, 2016<sup>2</sup>; Morinière *et al.*, 2019<sup>3</sup>.

84  
 85

86 Amplification success and fragment length were determined using gel electrophoresis. The  
 87 amplified DNA was cleaned and each sample was resuspended in 50 µL of molecular water.

88 Illumina Nextera XT (Illumina Inc., San Diego, USA) indices were ligated to the samples in a  
89 second PCR, conducted at the same annealing temperature as in the first but with only seven cycles.  
90 Ligation success was confirmed by gel electrophoresis. DNA concentrations were measured using  
91 a Qubit fluorometer (Life Technologies, Carlsbad, USA), and the samples then combined into 40-  
92  $\mu$ L pools containing equimolar concentrations of 100 ng each. The pooled DNA was purified using  
93 MagSi-NGSprep Plus beads (Steinbrenner Laborsysteme GmbH, Wiesenbach, Germany). The  
94 final elution volume was 20  $\mu$ L. HTS was performed on an Illumina MiSeq using v3 chemistry  
95 (2\*300bp, 600 cycles, maximum of 25mio paired-end reads).

96

### 97 *Bioinformatics*

98 Paired-ends were merged using the *-fastq\_mergepairs* utility of the USEARCH suite  
99 v11.0.667\_i86linux32<sup>4</sup> with the following parameters: *-fastq\_maxdiffs* 99, *-fastq\_pctid* 75, *-*  
100 *fastq\_trunctail* 0. Adapter sequences were removed using CUTADAPT K5 (default parameters).  
101 All sequences that did not contain the appropriate adapter sequences were filtered out in this step  
102 using the *--discard-untrimmed* parameter. The remaining pre-processing steps (quality filtering,  
103 dereplication, chimera filtering, and clustering) were carried out using the VSEARCH suite  
104 v2.9.1<sup>6</sup>. Quality filtering was performed using the *--fastq\_filter* VSEARCH utility (parameters: *--*  
105 *fastq\_maxee* 1, *--minlen* 300). Sequences were dereplicated with *--derep\_fulllength* (parameters: *-*  
106 *-sizeout*, *--relabel Uniq*), first at the sample level (output: ***all.derep.uc***), and then at the combined  
107 dataset level after concatenating all sample files into one large FASTA file (***all.fasta***), which was  
108 also filtered for singletons (sequences occurring only once in the entire dataset and *a priori*  
109 considered as noise; parameters: *--minuniquesize* 2, *--sizein*, *--sizeout*, *--fasta\_width* 0; resulting  
110 file: ***all.derep.fasta***). To save processing power, a pre-clustering step (at 98% identity) was  
111 employed before chimera filtering using the *--cluster\_size* VSEARCH utility with the centroids  
112 algorithm (parameters: *--id* 0.98, *--strand plus*, *--sizein*, *--sizeout*, *--fasta\_width* 0, *--centroids*;  
113 input: ***all.derep.fasta***; outputs: ***all.preclustered.uc***, ***all.preclustered.fasta***). Chimeric sequences  
114 were then detected and filtered out from the resulting file using the VSEARCH *--uchime\_denovo*  
115 utility (parameters: *--sizein*, *--sizeout*, *--fasta\_width* 0, *--nonchimeras*; input:  
116 ***all.preclustered.fasta***; output: ***all.denovo.nonchimeras.fasta***). The remaining sequences were then  
117 clustered into OTUs at 97% identity using *--cluster\_size* (parameters: see below).

118 To create the OTU table, a custom perl script was used to extract all non-chimeric non-singleton  
119 sequences from the dereplicated dataset (inputs: *all.derep.fasta*, *all.preclustered.uc*,  
120 *all.denovo.nonchimeras.fasta*; output: ***all.nonchimeras.derep.fasta***), and then all non-chimeric  
121 non-singletons from each sample (inputs: *all.fasta*, *all.derep.uc*, *all.nonchimeras.derep.fasta*;  
122 output: ***all.nonchimeras.fasta***). The task of perl script was to recover all of the quality- and  
123 chimera-filtered sequences from the individual samples, including singletons, as well as sequences  
124 that had been removed during the two rounds of dereplication. The resulting file  
125 (*all.nonchimeras.fasta*) was then used to map the reads to the OTUs and thus create the OTU table  
126 (parameters: `--cluster size all.nonchimeras.fasta, --id 0.97, --strand plus, --sizein, --sizeout, --`  
127 `fasta_width 0, --uc, --relabel OTU, --centroids otus.fasta, --otutabout otu_table.txt`). To reduce  
128 the risk of false-positives, a cleaning step was employed that excluded read counts in the OTU  
129 table constituting < 0.01% of the total number of reads in the sample. OTUs were blasted  
130 (parameters: program: Megablast; maximum hits: 1; scoring (match mismatch): 1-2; gap cost  
131 (open extend): linear; max E-value: 10; word size: 28; max target seqs 100) against (1) a custom  
132 database downloaded from GenBank (a local copy of the NCBI nucleotide database downloaded  
133 from ftp://ftp.ncbi.nlm.nih.gov/blast/db/), and (2) a custom database built from data downloaded  
134 from BOLD ([www.boldsystems.org](http://www.boldsystems.org))<sup>7,8</sup> including taxonomy and BIN information, by means of  
135 Geneious (v.10.2.5 – Biomatters, Auckland, New Zealand), and following the methods described  
136 in Morinière *et al.* (2016)<sup>2</sup>. The resulting csv files, which included the OTU ID, BOLD Process  
137 ID, BIN, Hit-%-ID value (percentage of overlap similarity (identical base pairs) of an OTU query  
138 sequence with its closest counterpart in the database), Grade-%-ID value (combining query  
139 coverage, E-value and identity values for each hit with weights of 0.5, 0.25 and 0.25 respectively,  
140 allowing determination of the longest, highest-identity hits), the length of the top BLAST hit  
141 sequence, as well as the phylum, class, order, family, genus and species information for each  
142 detected OTU were exported from Geneious and combined with the OTU table generated by the  
143 bioinformatic pre-processing pipeline. As an additional measure of control other than BLAST, the  
144 OTUs were classified into taxa using the Ribosomal Database Project (RDP) naïve Bayesian  
145 classifier<sup>9</sup> trained on a cleaned COI dataset of Arthropods and Chordates (plus outgroups; see  
146 Porter & Hajibabei, 2018)<sup>10</sup>. To reduce the risk of false-positives, the combined results table was  
147 then filtered, excluding those read counts in the OTU table accounting for < 0.01% of the total  
148 number of reads in the sample. OTUs were additionally removed from the results based on negative



149 control samples, i.e. if the combined number of reads in the negative controls constituted > 20%  
150 of the total number of reads in the OTU. OTUs were also annotated with the taxonomic information  
151 from the NCBI (downloaded from <https://ftp.ncbi.nlm.nih.gov/pub/taxonomy/>), followed by the  
152 creation of a taxonomic consensus between BOLD, NCBI and RDP. Interactive Krona charts were  
153 produced from the taxonomic information using KronaTools v1.311.

154  
155

156

157

## 158 Supplementary References

159

160

- 161 1. Matthieu, L. *et al.* A new versatile primer set targeting a short fragment of the mitochondrial  
162 COI region for metabarcoding metazoan diversity: application for characterizing coral reef  
163 fish gut contents. *Frontiers in Zoology* **10**, 2013
- 164 2. Morinière, J. *et al.* Species Identification in Malaise Trap Samples by DNA Barcoding Based  
165 on NGS Technologies and a Scoring Matrix. *PloS one* **11**, e0155497 (2016).
- 166 3. Morinière, J. *et al.* A DNA barcode library for 5,200 German flies and midges (Insecta:  
167 Diptera) and its implications for metabarcoding-based biomonitoring. *Molec. Ecol. Resources*  
168 **19**, 900–928 (2019).
- 169 4. Edgar, R., C., Search and clustering orders of magnitude faster than BLAST. *Bioinformatics*  
170 (*Oxford, England*) **26**, 2460–2461 (2010).
- 171 5. Martin, M. Cutadapt removes adapter sequences from high-throughput sequencing reads.  
172 *EMBnet* (2011).
- 173 6. Rognes, T., Flouri, T., Nichols, B., Quince, C., Mahé, F., VSEARCH: a versatile open source  
174 tool for metagenomics. *PeerJ* **4**, e2584 (2016).
- 175 7. Ratnasingham, S., Hebert, P., D., N., bold: The Barcode of Life Data System  
176 (<http://www.barcodinglife.org>). *Molec. Ecol. Resources* **7**, 355–364 (2007).
- 177 8. Ratnasingham, S., Hebert, P., D., N., A DNA-based registry for all animal species: the  
178 barcode index number (BIN) system. *PloS one* **8**, e66213 (2013).
- 179 9. Wang, Q., Garrity, G., M., Tiedje, J., M., Cole, J., R., Naive Bayesian classifier for rapid  
180 assignment of rRNA sequences into the new bacterial taxonomy. *Appl. Environ. Microb.* **73**,  
181 5261–5267 (2007).
- 182 10. Porter, T., M., Hajibabaei, M., Automated high throughput animal CO1 metabarcoding  
183 classification. *Sci. Rep.* **8**, 4226 (2018).
- 184 11. Ondov, B., D., Bergmann, N., H., Phillippy, A., M., Interactive metagenomic visualization in  
185 a Web browser. *Bioinformatics* **2011**.
- 186 12. Hallmann, C. A. *et al.* More than 75 percent decline over 27 years in total flying insect  
187 biomass in protected areas. *PloS one* **12**, e0185809; 10.1371/journal.pone.0185809 (2017).
